# Supplementary material for: Kindness Matters: A Randomized Controlled Trial of a Mindful Self-Compassion Intervention Improves Depression, Distress, and HbA1c Among Patients With Diabetes
Source: Oxford University Press journal article supplement (doi:10.2337/dc16-0416), 2016-06-22
Supplement: dc160416supplementarydata.pdf [file dc160416supplementarydata.pdf]

SUPPLEMENTARY DATA

**Appendix 1.** MSC Session plan (extracted from Neff & Germer, 2012)

| Session   | Outline                                                                                     |
|-----------|---------------------------------------------------------------------------------------------|
| Session 1 | General introduction and review of self-compassion (what it is, and what it is not).        |
| Session 2 | Provides foundational knowledge and practice of mindfulness                                 |
| Session 3 | Discusses the application of self-compassion in various aspects of life                     |
| Session 4 | Helps participants recognise their inner critic and develop a compassionate inner voice     |
| Session 5 | Emphasizes the importance of living in accordance with core values                          |
| Session 6 | Teaches skills to deal with difficult emotions                                              |
| Session 7 | Teaches skills for dealing with challenging interpersonal relationships                     |
| Session 8 | Teaches skills for relating to positive aspects of oneself and one's life with appreciation |
